# Supplementary material for: Do extra compulsory physical education lessons mean more physically active children - findings from the childhood health, activity, and motor performance school study Denmark (The CHAMPS-study DK)
Source: PubMed Central journal article supplement (PMC4180151; doi:10.1186/s12966-014-0121-0), 2014-09-24

**Supplementary figure 1.** Participants flow in the CHAMPS-study DK

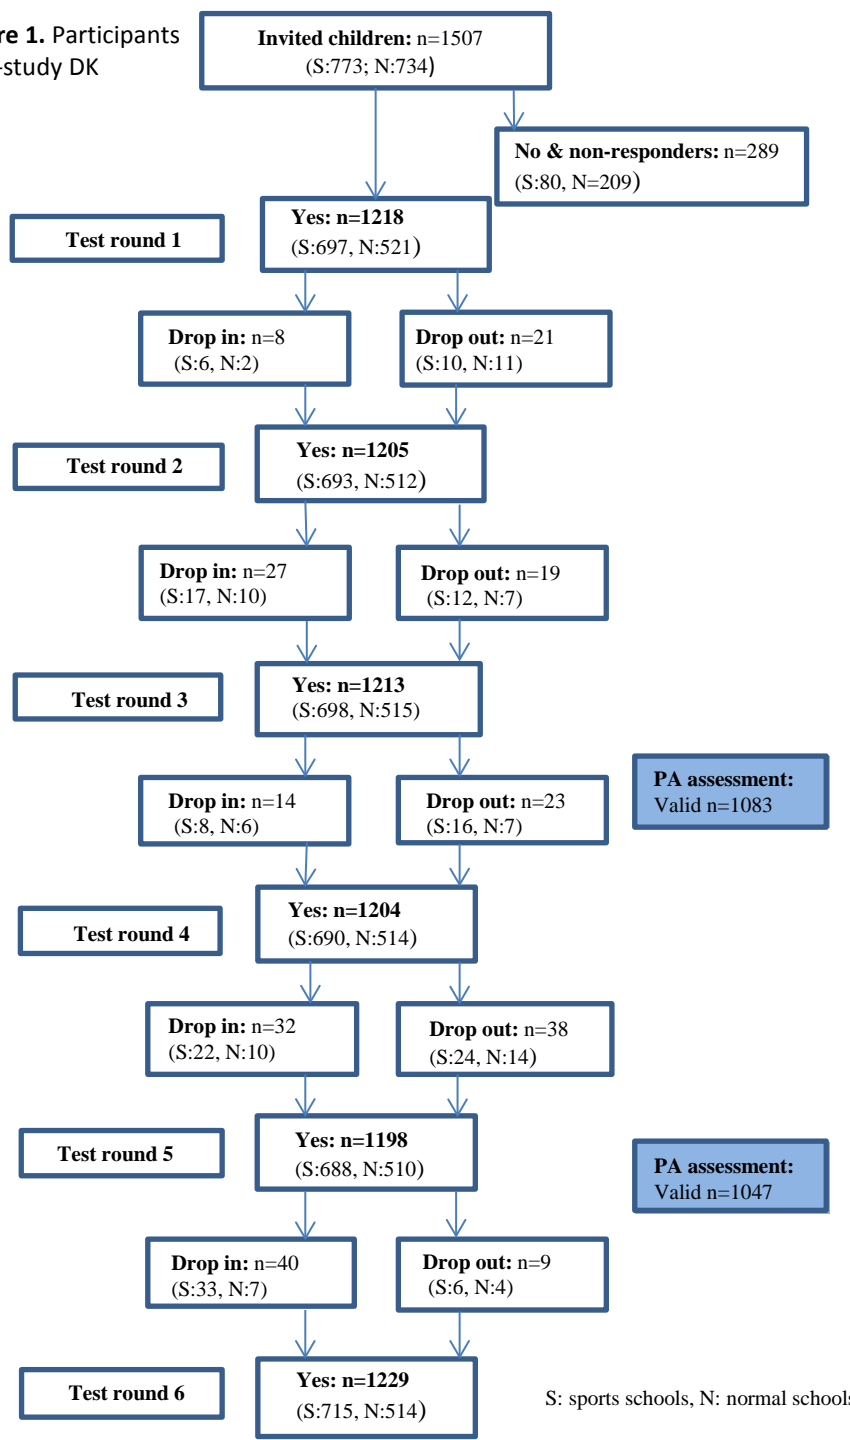

Supplement: 12966_2014_121_MOESM1_ESM.pdf [file 12966_2014_121_MOESM1_ESM.pdf]
