# Supplementary material for: Do extra compulsory physical education lessons mean more physically active children - findings from the childhood health, activity, and motor performance school study Denmark (The CHAMPS-study DK)
Source: PubMed Central journal article supplement (PMC4180151; doi:10.1186/s12966-014-0121-0), 2014-09-24
Supplement: 12966_2014_121_MOESM2_ESM.pdf [file 12966_2014_121_MOESM2_ESM.pdf]

**Supplementary table 1.** Standard waking hour definition across different age groups and weekdays

| <b>Grade</b>          | <b>Mon-Thurs</b> | <b>Friday</b> | <b>Saturday</b> | <b>Sunday</b> |
|-----------------------|------------------|---------------|-----------------|---------------|
| 1 <sup>st</sup> grade | 06.30-20.30      | 06.30-22.00   | 08.00-22.00     | 08.00-20.30   |
| 2 <sup>nd</sup> grade | 06.30-21.00      | 06.30-22.00   | 08.00-22.00     | 08.00-21.00   |
| 3 <sup>rd</sup> grade | 06.30-21.00      | 06.30-22.30   | 08.00-22.30     | 08.00-21.00   |
| 4 <sup>th</sup> grade | 06.30-21.30      | 06.30-22.30   | 08.00-22.30     | 08.00-21.30   |
| 5 <sup>th</sup> grade | 06.30-22.00      | 06.30-23.00   | 08.00-23.00     | 08.00-22.00   |
| 6 <sup>th</sup> grade | 06.30-22.00      | 06.30-23.00   | 08.00-23.00     | 08.00-22.00   |
