# Supplementary material for: Do extra compulsory physical education lessons mean more physically active children - findings from the childhood health, activity, and motor performance school study Denmark (The CHAMPS-study DK)
Source: PubMed Central journal article supplement (PMC4180151; doi:10.1186/s12966-014-0121-0), 2014-09-24
Supplement: 12966_2014_121_MOESM3_ESM.pdf [file 12966_2014_121_MOESM3_ESM.pdf]

**Supplementary table 2.** Age, anthropometrics and cardio-respiratory fitness assessed at children’s schools in March/April 2010 between the two accelerometer assessment periods. Data are crude means (SD) and proportions presented by gender and grade

|                 | <b>1<sup>st</sup> grade</b> | <b>n</b> | <b>2<sup>nd</sup> grade</b> | <b>n</b> | <b>3<sup>rd</sup> grade</b> | <b>n</b> | <b>4<sup>th</sup> grade</b> | <b>n</b> | <b>5<sup>th</sup> grade</b> | <b>n</b> |
|-----------------|-----------------------------|----------|-----------------------------|----------|-----------------------------|----------|-----------------------------|----------|-----------------------------|----------|
| <b>Total</b>    |                             |          |                             |          |                             |          |                             |          |                             |          |
| Age (years)     | 7.9 (0.4)                   | 196      | 8.9 (0.3)                   | 222      | 9.9 (0.4)                   | 250      | 10.9 (0.3)                  | 236      | 11.9 (0.4)                  | 225      |
| Height (cm)     | 129 (6)                     | 187      | 136 (6)                     | 213      | 141 (7)                     | 234      | 146 (6)                     | 226      | 152 (7)                     | 213      |
| Weight (kg)     | 26.9 (4.0)                  | 187      | 31.1 (5.5)                  | 213      | 34.2 (6)                    | 234      | 37.8 (6.9)                  | 226      | 42.3 (8.5)                  | 213      |
| NW/OW/OB (n(%)) | 171 (91) / 14 (7) / 2 (1)   | 187      | 188 (88) / 20 (11) / 5 (3)  | 213      | 202 (86) / 30 (13) / 2 (1)  | 234      | 201 (89) / 21 (9) / 4 (2)   | 226      | 188 (88) / 23 (11) / 2 (1)  | 213      |
| Fitness (m)     | 895 (80)                    | 182      | 927 (90)                    | 205      | 960 (109)                   | 215      | 992 (102)                   | 206      | 1010 (97)                   | 198      |
| <b>Boys</b>     |                             |          |                             |          |                             |          |                             |          |                             |          |
| Age (years)     | 7.9 (0.4)                   | 89       | 9.0 (0.3)                   | 100      | 10.0 (0.4)                  | 133      | 10.9 (0.3)                  | 103      | 11.9 (0.4)                  | 106      |
| Height (cm)     | 130 (6)                     | 85       | 137 (6)                     | 98       | 142 (7)                     | 123      | 147 (7)                     | 98       | 153 (7)                     | 100      |
| Weight (kg)     | 27.1 (4)                    | 85       | 31.3 (5.0)                  | 98       | 34.6 (6.1)                  | 123      | 38.0 (7.0)                  | 98       | 42.2 (8.5)                  | 100      |
| NW/OW/OB (n(%)) | 80 (94) / 5 (6) / 0 (0)     | 85       | 89 (91) / 9 (9) / 0 (0)     | 98       | 108 (88) / 14 (11) / 1 (1)  | 123      | 90 (92) / 5 (5) / 3 (3)     | 98       | 90 (90) / 10 (10) / 0 (0)   | 100      |
| Fitness (m)     | 919 (83)                    | 82       | 963 (86)                    | 93       | 1002 (108)                  | 111      | 1040 (99)                   | 90       | 1043 (106)                  | 93       |
| <b>Girls</b>    |                             |          |                             |          |                             |          |                             |          |                             |          |
| Age (years)     | 7.8 (0.4)                   | 107      | 8.9 (0.3)                   | 122      | 9.9 (0.3)                   | 117      | 10.8 (0.3)                  | 133      | 11.8 (0.4)                  | 119      |
| Height (cm)     | 128 (6)                     | 102      | 135 (6)                     | 115      | 139 (6)                     | 111      | 146 (6)                     | 128      | 151 (7)                     | 113      |
| Weight (kg)     | 26.8 (4.2)                  | 102      | 30.9 (5.9)                  | 115      | 33.7 (6.5)                  | 111      | 37.7 (6.9)                  | 128      | 42.1 (8.5)                  | 113      |
| NW/OW/OB (n(%)) | 91 (89) / 9 (9) / 2 (2)     | 102      | 99 (86) / 11 (10) / 5 (3)   | 115      | 94 (85) / 16 (14) / 1 (1)   | 111      | 111 (87) / 16 (13) / 1 (1)  | 128      | 98 (87) / 13 (12) / 2 (2)   | 113      |
| CRF (m)         | 875 (73)                    | 100      | 898 (83)                    | 112      | 915 (90)                    | 104      | 954 (89)                    | 116      | 980 (78)                    | 105      |

NW: normal weight, OW: overweight, OB: obese, CRF: cardio-respiratory fitness. Only children who were tested at their school in spring 2010 and attained valid accelerometer assessments are included in the table. Due to some children possessing missing values in some tests and some children being absent when testing was performed at the schools, “n” differs across variables presented and across presented variables and PA outcomes reported in the study
