# Supplementary material for: Do extra compulsory physical education lessons mean more physically active children - findings from the childhood health, activity, and motor performance school study Denmark (The CHAMPS-study DK)
Source: PubMed Central journal article supplement (PMC4180151; doi:10.1186/s12966-014-0121-0), 2014-09-24

**Supplementary figure 2.** Illustrations of significant interactions between physical activity levels across school type and assessment year

Overall CPM in boys

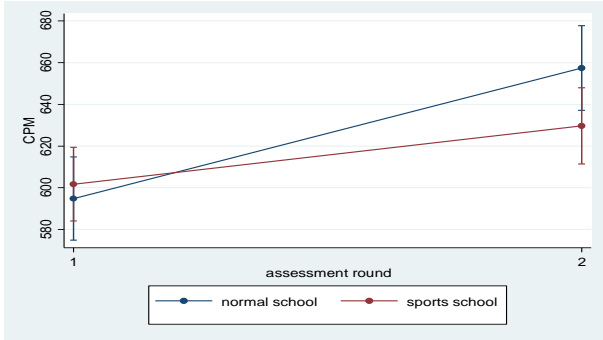

Leisure-time CPM in boys

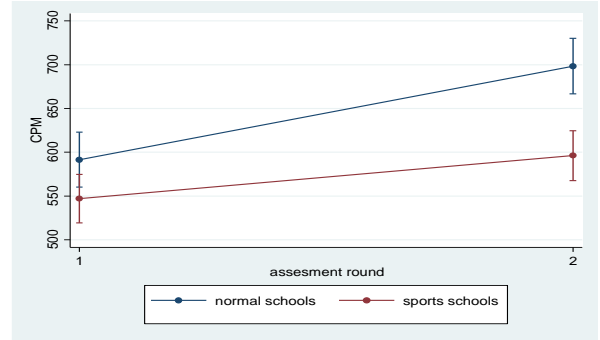

School time CPM in girls

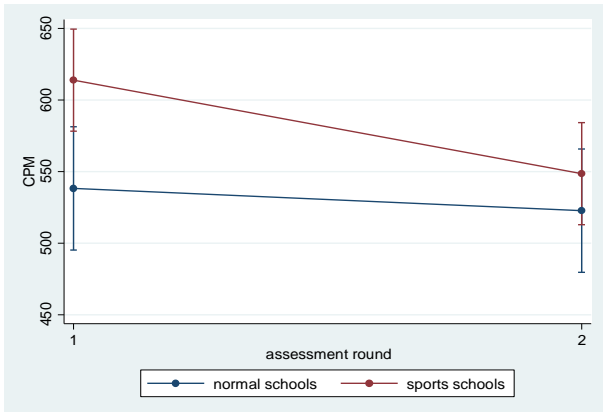

Recess CPM in girls

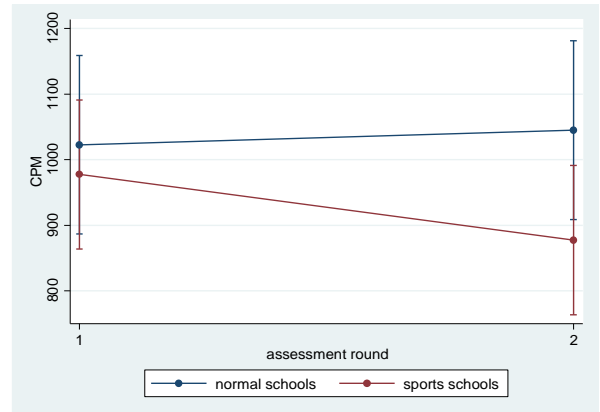

PE CPM in girls

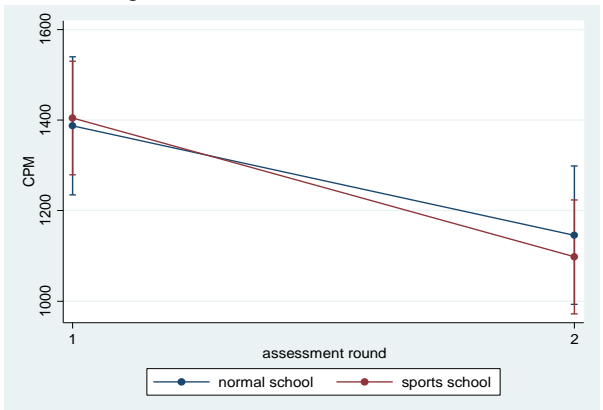

Supplement: 12966_2014_121_MOESM5_ESM.pdf [file 12966_2014_121_MOESM5_ESM.pdf]
